# Supplementary material
Source: Springer Nature journal article supplement (http://www.springermedizin.de/resource/supplementary/13046_2010_443_MOESM1_ESM.pdf/9662240)

LgR5 (colon)

**a**

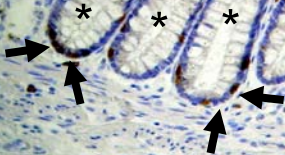

**b**

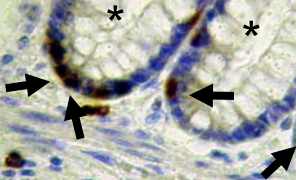

Supplement: MOESM1 [file 9662240]
